1 **Impact of rare and common genetic variants on diabetes**  
2 **diagnosis by hemoglobin A1c in multi-ancestry cohorts:**  
3 **The Trans-Omics for Precision Medicine Program**  
4

5 **Authors**

6 Chloé Sarnowski,<sup>1,35,37,\*</sup> Aaron Leong,<sup>2,3,4,35,38,\*\*</sup> Laura M Raffield,<sup>5</sup> Peitao Wu,<sup>1</sup> Paul S de  
7 Vries,<sup>6</sup> Daniel DiCorpo,<sup>1</sup> Xiuqing Guo,<sup>7</sup> Huichun Xu,<sup>8</sup> Yongmei Liu,<sup>9</sup> Xiuwen Zheng,<sup>10</sup> Yao  
8 Hu,<sup>11</sup> Jennifer A Brody,<sup>12</sup> Mark O Goodarzi,<sup>13</sup> Bertha A Hidalgo,<sup>14</sup> Heather M Highland,<sup>15</sup>  
9 Deepti Jain,<sup>10</sup> Ching-Ti Liu,<sup>1</sup> Rakhi P Naik,<sup>16</sup> James A Perry,<sup>17</sup> Bianca C Porneala,<sup>2</sup> Elizabeth  
10 Selvin,<sup>18</sup> Jennifer Wessel,<sup>19,20</sup> Bruce M Psaty,<sup>12,21,22</sup> Joanne E Curran,<sup>23</sup> Juan M Peralta,<sup>23</sup> John  
11 Blangero,<sup>23</sup> Charles Kooperberg,<sup>11</sup> Rasika Mathias,<sup>18,24</sup> Andrew D Johnson,<sup>25,26</sup> Alexander P  
12 Reiner,<sup>11,27</sup> Braxton D Mitchell,<sup>8,28</sup> L Adrienne Cupples,<sup>1,25</sup> Ramachandran S Vasana,<sup>25,29,30</sup>  
13 Adolfo Correa,<sup>31,32</sup> Alanna C Morrison,<sup>6</sup> Eric Boerwinkle,<sup>6,33</sup> Jerome I Rotter,<sup>7</sup> Stephen S Rich,<sup>34</sup>  
14 Alisa K Manning,<sup>2,3,4</sup> Josée Dupuis,<sup>1,25,36</sup> James B Meigs,<sup>2,3,4,36</sup> on behalf of the Trans-Omics for  
15 Precision Medicine (TOPMed) Diabetes and TOPMed Hematology and Hemostasis working  
16 groups and the NHLBI TOPMed Consortium.

17  
18 **Affiliations**

19 <sup>1</sup> Department of Biostatistics, Boston University School of Public Health, Boston, MA 02118,  
20 USA

21 <sup>2</sup> Division of General Internal Medicine, Massachusetts General Hospital, Boston 02114, MA  
22 USA

23 <sup>3</sup> Department of Medicine, Harvard Medical School, Boston, MA 02115, USA

24 <sup>4</sup> Programs in Metabolism and Medical & Population Genetics, Broad Institute of MIT and  
25 Harvard, Cambridge, MA 02142, USA

26 <sup>5</sup> Department of Genetics, University of North Carolina, Chapel Hill, NC 27514, USA

27 <sup>6</sup> Human Genetics Center, Department of Epidemiology, Human Genetics, and Environmental  
28 Sciences, School of Public Health, University of Texas Health Science Center at Houston,  
29 Houston, TX 77030, USA

30 <sup>7</sup> Institute for Translational Genomics and Population Sciences, LABioMed and Department of  
31 Pediatrics at Harbor-UCLA Medical Center, Torrance, CA 90502, USA

32 <sup>8</sup> Division of Endocrinology, Diabetes and Nutrition, Department of Medicine, University of  
33 Maryland School of Medicine, Baltimore, MD 21201, USA

34 <sup>9</sup> Department of Epidemiology & Prevention, Wake Forest School of Medicine, Winston-Salem,  
35 NC 27101, USA

36 <sup>10</sup> Department of Biostatistics, University of Washington, Seattle, WA 98195, USA

37 <sup>11</sup> Division of Public Health Sciences, Fred Hutchinson Cancer Research Center, Seattle, WA  
38 98108, USA

39 <sup>12</sup> Cardiovascular Health Research Unit, Department of Medicine, University of Washington,  
40 Seattle, WA 98195, USA

41 <sup>13</sup> Division of Endocrinology, Diabetes, and Metabolism, Department of Medicine, Cedars-Sinai  
42 Medical Center, Los Angeles, CA 90048, USA

43 <sup>14</sup> University of Alabama at Birmingham, Department of Epidemiology, Birmingham, AL 35294,  
44 USA

45 <sup>15</sup> Department of Epidemiology, UNC Gillings School of Global Public Health, University of  
46 North Carolina at Chapel Hill, Chapel Hill, NC 27599, USA

47 <sup>16</sup> Division of Hematology, Department of Medicine, Johns Hopkins University, Baltimore, MD  
48 21205, USA

49 <sup>17</sup> University of Maryland School of Medicine, Baltimore, MD 21205, USA

50 <sup>18</sup> Department of Epidemiology, Johns Hopkins Bloomberg School of Public Health, Baltimore,  
51 MD 21205, USA

52 <sup>19</sup> Department of Epidemiology, Indiana University Fairbanks School of Public Health,  
53 Indianapolis, IN 46202, USA

54 <sup>20</sup> Department of Medicine and Diabetes Translational Research Center, Indiana University  
55 School of Medicine, Indianapolis, IN 46202, USA.

56 <sup>21</sup> Kaiser Permanente Washington Health Research Institute, Seattle, WA 98101, USA.

57 <sup>22</sup> Departments of Epidemiology and Health Services, University of Washington, Seattle, WA  
58 98195, USA.

59 <sup>23</sup> Department of Human Genetics and South Texas Diabetes and Obesity Institute, University of  
60 Texas Rio Grande Valley School of Medicine, Brownsville, TX 78520, USA

61 <sup>24</sup> GeneSTAR Research Program, Department of Medicine, Johns Hopkins University,  
62 Baltimore, MD 21205, USA

63 <sup>25</sup> National Heart Lung and Blood institute and Boston University's Framingham Heart Study,  
64 Framingham MA 01702, USA

65 <sup>26</sup> Population Sciences Branch, National Heart, Lung, and Blood Institute, National Institutes of  
66 Health, Bethesda, MD 20814, USA

67 <sup>27</sup> Department of Epidemiology, University of Washington, Seattle, WA 98195, USA

68 <sup>28</sup> Geriatrics Research and Education Clinical Center, Baltimore Veterans Administration  
69 Medical Center, Baltimore, MD 21201, USA

70 <sup>29</sup> Section of Preventive Medicine and Epidemiology, Evans Department of Medicine, Boston  
71 University School of Medicine, Boston, MA 02118, USA

72 <sup>30</sup> Whitaker Cardiovascular Institute and Cardiology Section, Evans Department of Medicine,  
73 Boston University School of Medicine, Boston, MA 02118, USA

74 <sup>31</sup> Departments of Medicine, Pediatrics and Population Health Science, University of Mississippi  
75 Medical Center, Jackson, MS 39216, USA

76 <sup>32</sup> The Jackson Heart Study, Jackson, MS 39213, USA

77 <sup>33</sup> Human Genome Sequencing Center, Baylor College of Medicine, Houston, TX 77030, USA

78 <sup>34</sup> Center for Public Health Genomics, University of Virginia, Charlottesville, VA 22908, USA

79

## 80 **Joint Authorship**

81 <sup>35</sup> These authors contributed equally to this work

82 <sup>36</sup> These authors contributed equally to this work

83

## 84 **Present Address**

85 <sup>37</sup> Department of Biostatistics, Boston University School of Public Health, 801 Massachusetts  
86 Avenue, MA 02118, Boston, USA

87 <sup>38</sup> Division of General Internal Medicine, Massachusetts General Hospital, 100 Cambridge St  
88 16<sup>th</sup> Floor, MA 02114, Boston, USA

89

## 90 **Correspondence**

91 \*chloesar@bu.edu

92 \*\*ASLEONG@partners.org

## 93 **Abstract**

94 Hemoglobin A1c (HbA1c) is widely used to diagnose diabetes and assess glycemic control in  
95 patients with diabetes. However, nonglycemic determinants, including genetic variation, may  
96 influence how accurately HbA1c reflects underlying glycemia. Analyzing the NHLBI Trans-  
97 Omics for Precision Medicine (TOPMed) sequence data in 10,338 individuals from five studies  
98 and four ancestries (6,158 Europeans, 3,123 African-Americans, 650 Hispanics and 407 East  
99 Asians), we confirmed five regions associated with HbA1c (*GCK* in Europeans and African-  
100 Americans, *HK1* in Europeans and Hispanics, *FN3K/FN3KRP* in Europeans and *G6PD* in  
101 African-Americans and Hispanics) and discovered a new African-ancestry specific low-  
102 frequency variant (rs1039215 in *HBG2/HBE1*, minor allele frequency (MAF)=0.03). The most  
103 associated *G6PD* variant (p.Val98Met, rs1050828-T, MAF=12% in African-Americans,  
104 MAF=2% in Hispanics) lowered HbA1c (-0.88% in hemizygous males, -0.34% in heterozygous  
105 females) and explained 23% of HbA1c variance in African-Americans and 4% in Hispanics.  
106 Additionally, we identified a rare distinct *G6PD* coding variant (rs76723693 - p.Leu353Pro,  
107 MAF=0.5%; -0.98% in hemizygous males, -0.46% in heterozygous females) and detected  
108 significant association with HbA1c when aggregating rare missense variants in *G6PD*. We  
109 observed similar magnitude and direction of effects for rs1039215 (*HBG2*) and rs76723693  
110 (*G6PD*) in the two largest TOPMed African-American cohorts and replicated the rs76723693  
111 association in the UK Biobank African-ancestry participants. These variants in *G6PD* and *HBG2*  
112 were monomorphic in the European and Asian samples. African or Hispanic ancestry individuals  
113 carrying *G6PD* variants may be underdiagnosed for diabetes when screened with HbA1c. Thus,  
114 assessment of these variants should be considered for incorporation into precision medicine  
115 approaches for diabetes diagnosis.

116

## 117 **Introduction**

118 Hemoglobin A1c (HbA1c) is a convenient indirect measure of long-term exposure to  
119 blood glucose concentrations. HbA1c estimates the proportion of glycosylated hemoglobin in the  
120 blood, an irreversible chemical modification of the hemoglobin molecule by blood glucose.<sup>1</sup> As  
121 HbA1c reflects average ambient glycemia over the previous 2-3 months, the life of an  
122 erythrocyte, it is commonly used as a test to diagnose diabetes (MIM: 125853 and 222100) and  
123 estimate glycemic control in patients with diabetes. However, non-glycemic variation in HbA1c  
124 due to differences in erythrocyte turnover can influence how accurately HbA1c reflects  
125 underlying glycemia.<sup>2</sup>

126 We previously conducted a trans-ethnic genome-wide association study (GWAS) meta-  
127 analysis of HbA1c in 159,940 individuals from four ancestries (European, African, East Asian,  
128 and South Asian). We identified 60 common (minor allele frequency, MAF, greater than 5%)  
129 genetic variants associated with HbA1c, of which 19 were classified as ‘glycemic’ and 22 as  
130 ‘erythrocytic’ based on the probable biological mechanism through which they appeared to  
131 influence HbA1c levels.<sup>3</sup> Genetic variants affecting HbA1c via erythrocyte biological pathways  
132 may lead to diagnostic misclassification of ambient glycemia and thus diabetes status. HbA1c  
133 GWAS have so far focused on genetic variants imputed to HapMap,<sup>4</sup> therefore genetic discovery  
134 efforts have been focused on common variants. Low-frequency ( $0.5\% < \text{MAF} < 5\%$ ) and rare  
135 ( $\text{MAF} < 0.5\%$ ) genetic variants and their associated impact on the diagnostic accuracy of HbA1c  
136 have not been systematically examined but are suspected to occur.<sup>5, 6</sup> Further, previous GWAS  
137 have shown that the combined effect of HbA1c-related common variants causes differences in  
138 HbA1c that were three times greater in individuals of African ancestry compared with those of  
139 European ancestry [0.8 (%-units) vs. 0.25 (%-units)].<sup>3</sup> This relatively large difference in HbA1c

140 was mainly driven by a single African-ancestry specific missense variant (p.Val98Met,  
141 rs1050828-T) in the Glucose-6-phosphatase Dehydrogenase gene (*G6PD* [MIM:305900]), which  
142 causes G6PD deficiency (MIM: 300908).<sup>7, 8</sup> As the genetic architecture of HbA1c appears to  
143 differ by ancestry, as does type 2 diabetes risk, it is imperative to understand the genetic basis of  
144 HbA1c in different ancestral groups to ensure that large-effect ancestry-specific variants, similar  
145 to the *G6PD* variant, are uncovered.<sup>9</sup>

146 Here, we sought to confirm common and identify low frequency and rare genetic variants  
147 associated with HbA1c through association analyses in diabetes-free individuals from four  
148 ancestries using whole genome sequencing (WGS) data from the NIH National Heart, Lung, and  
149 Blood Institute (NHLBI) Trans-Omics for Precision Medicine (TOPMed) program. We  
150 hypothesized that variants in the low frequency spectrum with relatively large effects will be  
151 detected even with modest sample sizes. To uncover additional distinct erythrocytic variants  
152 associated with HbA1c, we performed fine-mapping using sequential conditional association  
153 analyses of erythrocytic loci that reached genome-wide significance in this study as well as gene-  
154 based tests.

155

## 156 **Methods**

### 157 **Populations and participants**

158 We included in our analyses 10,338 TOPMed participants without diabetes from five  
159 cohorts: the Old Order Amish study (N=151), the Atherosclerosis Risk in Communities Study  
160 (ARIC, N=2,415), the Framingham Heart Study (FHS, N=2,236), the Jackson Heart Study (JHS,  
161 N=2,356) and the Multi-Ethnic Study of Atherosclerosis (MESA, N=3,180) representing four  
162 ancestry groups: Europeans (EA, N=6,158), African-Americans (AA, N=3,123),

163 Hispanics/Latinos (HA, N=650) and East Asians (AS, N=407) (**Supplementary Table 1**).  
164 Descriptions of each cohort are available in the **Supplementary Text**. Diabetes was defined as  
165 fasting glucose (FG)  $\geq 7$  mmol/L after  $\geq 8$  hours, HbA1c  $\geq 6.5\%$ -units, 2-hour glucose by an oral  
166 glucose tolerance test  $\geq 11.1$  mmol/L, non-fasting glucose  $\geq 11.1$  mmol/L, physician diagnosed  
167 diabetes, self-reported diabetes, or use of an antidiabetic medication. Measures of FG and 2-hour  
168 glucose made in whole blood were corrected to plasma levels using the correction factor of 1.13.  
169 Individual studies applied further sample exclusions where applicable, including pregnancy and  
170 type 1 diabetes status.

### 171 **Measurement of HbA1c and erythrocytic traits**

172 The National Glycohemoglobin Standardization Program (NGSP) certified assays<sup>10</sup> used  
173 to measure HbA1c in each cohort are indicated in **Supplementary Table 2**. HbA1c was  
174 expressed in NGSP %-units. Measurements for red blood cell (RBC) count ( $\times 10^{12}/L$ ),  
175 hemoglobin (HB; g/dL), hematocrit (HCT; %), mean corpuscular volume (MCV; fL), mean  
176 corpuscular hemoglobin (MCH; pg), mean corpuscular hemoglobin concentration (MCHC;  
177 g/dL), and red blood cell distribution width (RDW; %) were obtained from complete blood count  
178 panels performed using standard assays.

### 179 **Whole genome sequencing**

180 The NHLBI TOPMed program provided WGS, performed at an average depth of 38 $\times$  by  
181 several sequencing centers (New York Genome Center; Broad Institute of MIT and Harvard;  
182 University of Washington Northwest Genomics Center; Illumina Genomic Services; Macrogen  
183 Corp.; and Baylor Human Genome Sequencing Center), using DNA from blood. Details  
184 regarding the laboratory methods, data processing and quality control are described on the  
185 TOPMed website (see URL in the web resources section) and in documents included in each



186 TOPMed accession released on the database of Genotypes and Phenotypes (dbGaP). Processing  
187 of whole genome sequences was harmonized across genomic centers using a standard pipeline.<sup>11</sup>

188 We used TOPMed ‘freeze 5b’ that comprised 54,508 samples. Variant discovery and  
189 genotype calling were performed jointly across TOPMed parent studies for all samples using the  
190 GotCloud pipeline. A support vector machine quality filter was trained using known variants  
191 (positive training set) and Mendelian-inconsistent variants (negative training set). The TOPMed  
192 data coordinating center performed additional quality control checks for sample identity issues  
193 including pedigree errors, sex discrepancies, and genotyping concordance. After site level  
194 filtering, TOPMed freeze 5b consisted of ~438 million single nucleotide variants (SNVs) and  
195 ~33 million short insertion-deletion variants. Read mapping was done using the 1000 Genomes  
196 Project reference sequence versions for human genome build GRCh38.

197 The study was approved by the appropriate institutional review boards (IRB) and informed  
198 consent was obtained from all participants.

## 199 **Statistical analyses**

200 In each ancestry, we performed pooled WGS association analysis of HbA1c using  
201 Genesis on the Analysis Commons (see URL in the web resources section).<sup>12</sup> We used linear  
202 mixed effect models to test the association of HbA1c with the SNVs individually while adjusting  
203 for sex, age at HbA1c measurement and study, allowing for heterogeneous variance across study  
204 groups. We accounted for relatedness using an empirical kinship matrix (Genetic Relationship  
205 Matrix, GRM). We excluded from our single-SNV analyses variants with a minor allele count  
206 (MAC) less than 20 across the combined samples. We used a significance threshold of  $P < 2 \times 10^{-8}$   
207 to report an association as genome-wide significant for common, low frequency and rare  
208 genetic variants, which was slightly more stringent than the widely adopted P-value threshold of

209  $5 \times 10^{-8}$  in GWAS, based on estimations for genome-wide significance for WGS studies in  
210 UK10K.<sup>13, 14</sup> For the X chromosome, genotypes were coded as 0 and 2 for males and 0, 1 and 2  
211 for females, and sex-stratified analyses (analyses conducted separately in males and females)  
212 were also performed. We also performed additional analyses in AA, adjusted on the sickle cell  
213 trait (SCT) variant rs334, as well as haplotype analyses with this variant, using the R package  
214 haplo.stats.

215 Because loci that influence HbA1c through erythrocytic mechanisms are expected to  
216 cause nonglycemic variation in HbA1c, we sought to classify HbA1c-associated loci as  
217 ‘glycemic’ or ‘erythrocytic’ using mediation analyses on FG, HB, MCV, MCH or MCHC. If the  
218 HbA1c-variant association effect size changed by more than 25% upon adding FG to the  
219 regression model, the variant was classified as ‘glycemic’. If a variant was not ‘glycemic’, and if  
220 the effect size changed by more than 25% upon adding HB, MCV, MCH, or MCHC to the  
221 regression model, the variant was classified as ‘erythrocytic’. If association effect sizes were  
222 unchanged by mediation adjustment, then the variant was considered ‘unclassified’.

223 If HbA1c-associated variants remained unclassified by the mediation analyses, we used  
224 association analysis results with FG to classify them as ‘glycemic’ ( $P < 0.005$ ), and association  
225 analysis results with erythrocytic traits (HB, MCV, MCH, MCHC, RBC, HCT or RDW) to  
226 classify them as ‘erythrocytic’ ( $P < 0.005$ ). Association results for FG were obtained from a  
227 pooled association analysis performed using a linear mixed effect model in Genesis, adjusted on  
228 age, age squared, sex, BMI and self-report ancestry in TOPMed freeze 5b (N=26,883).  
229 Association results for erythrocytic traits were obtained from several sources. We first used  
230 single variant association analyses performed using a score test in Genesis and adjusted for age,  
231 sex, and study, with a GRM, while allowing for heterogeneous variance across study groups, in

232 TOPMed freeze 5b (N=25,080). The number of individuals included in each analysis, per study,  
233 is available in **Supplementary Table 3**. Analyses were performed at the University of  
234 Washington using the TOPMed pipeline. We then used association results from published  
235 GWAS in European (UK Biobank and INTERVAL studies; N=173,480),<sup>15</sup> Hispanic (Hispanic  
236 Community Health Study and Study of Latinos (HCHS/SOL); N=12,502),<sup>16</sup> and African-  
237 American participants (Continental Origins and Genetic Epidemiology [COGENT] Network;  
238 N~16,500,<sup>17</sup> and the Candidate gene Association Resource (CARE) Project N=7,112),<sup>18</sup> and  
239 exome genotyping in 130,273 multi-ethnic individuals.<sup>19</sup>

240 For loci classified as ‘erythrocytic’, we performed sequential conditional analyses to  
241 determine the number of distinct signals in each region. The regions were defined based on  
242 linkage disequilibrium (LD) plots. We used a Bonferroni correction for the number of SNVs in  
243 the region with  $MAC \geq 20$  to define a signal as distinct. We also performed gene-based and  
244 burden tests in Genesis using different selection of rare genetic variants ( $MAF \leq 1\%$ ) based on  
245 functional annotations (missense, high confidence loss of function or synonymous variants).

246 Results from each analysis were combined across ancestries or across sex by meta-  
247 analysis using METAL.<sup>20</sup> The heterogeneity test between males and females was calculated  
248 using the following formula:  $\frac{(\beta_{males} - \beta_{females})^2}{SE_{males}^2 + SE_{females}^2 - 2 \times r \times SE_{males} \times SE_{females}}$ . This assessed the  
249 difference in effect sizes between males ( $\beta_{males}$ ) and females ( $\beta_{females}$ ) while accounting for  
250 correlation (r) between male and female statistics due to relatedness and was calculated outside  
251 of METAL. LD calculations in the TOPMed data and regional plots were done, within ancestry  
252 group, using the Omics Analysis, Search and Information System (OASIS, see URL in the web  
253 resources section). Functional annotations were performed using the WGS Annotator  
254 (WGSA).<sup>21</sup>

255 We used the UK Biobank (UKBB, (see URL in the web resources section), a prospective cohort  
256 study with deep genetic and phenotypic data collected on approximately 500,000 individuals  
257 from across the United Kingdom, aged between 40 and 69 at recruitment, as an independent  
258 sample for external replication of our findings. The centralized analysis of the genetic data,  
259 including genotype quality, population structure and relatedness of the genetic data, and  
260 efficient phasing and genotype imputation has been described extensively elsewhere.<sup>22</sup> Two  
261 similar arrays were used for genotyping (Applied Biosystems UK Biobank Lung Exome Variant  
262 Evaluation and UK Biobank Axiom Arrays) and pre-phasing was performed using markers  
263 present on both arrays. Phasing on the autosomes was carried out using SHAPEIT3 and 1000  
264 Genomes phase 3 panel to help with the phasing of non-European ancestry samples. Imputations  
265 were carried out using the IMPUTE4 program with the Haplotype Reference Consortium (HRC)  
266 reference panel or with a merged UK10K and 1000 Genomes phase 3 reference panel. For  
267 chromosome X, haplotype estimation and genotype imputation were carried out separately on the  
268 pseudo-autosomal and non-pseudo autosomal regions.

269 We identified UKBB African-ancestry participants using the following six self-reported  
270 ethnicities: "Caribbean", "African", "Black or Black British", "Any other Black background",  
271 "White and Black African" and "White and Black Caribbean". We excluded participants with  
272 diabetes defined by the use of antidiabetic medication, self-reported physician diagnosis,  $FG \geq 7$   
273 mmol/L or non-fasting glucose  $\geq 11.1$  mmol/L.

274 We generated principal components using smartPCA (see URL in the web resources  
275 section)<sup>23, 24</sup> based on 72,300 common genetic variants in low LD selected with PLINK.<sup>25</sup> For  
276 each PC, ethnic outliers lying more than 6SD away from the mean were excluded. The same  
277 genetic variants were used to calculate an empirical kinship matrix using EPACTS (see URL

278 for EPACTS documentation in the web resources section). We used a linear mixed effect  
279 model in R to evaluate the association of each variant with HbA1c, adjusting for age, sex, 10 PCs  
280 and using the empirical kinship matrix.

281

## 282 **Results**

### 283 **HbA1c-associated regions using WGS**

284 We included in our analyses 10,338 TOPMed participants representing four ancestry  
285 groups: Europeans (EA, N=6,158), African-Americans (AA, N=3,123), Hispanics/Latinos (HA,  
286 N=650) and East Asians (AS, N=407; **Supplementary Table 1**). TOPMed studies were  
287 composed of middle to older-aged participants of EA, AA, HA or AS ancestry with comparable  
288 mean HbA1c, mean fasting glucose (FG) and mean hemoglobin (HB, **Supplementary Table 4**).  
289 A total of 13,079,661 variants (EA), 21,443,543 variants (AA), 9,567,498 variants (HA), and  
290 6,567,324 variants (AS) passed filters and were included in the analyses. QQ-plots and  
291 Manhattan plots of WGS associations with HbA1c from ancestry-specific analyses and the meta-  
292 analysis are provided in **Figure 1 and Supplementary Figures 1-2**. Using a significance  
293 threshold of  $P < 2 \times 10^{-8}$  to report an association as genome-wide significant, we detected five  
294 regions associated with HbA1c, including one novel locus (low-frequency AA-specific variant,  
295 rs1039215 in *HBG2* [MIM:142250] /*HBE1* [MIM:142100], MAF=0.03), and a sixth locus  
296 reaching suggestive evidence (rare AA-specific variant, rs551601853, near *XPNPEPI*  
297 [MIM:602443], MAF=0.003,  $P < 5 \times 10^{-7}$ ). Regional plots for the *HBG2/HBE1* and the  
298 *XPNPEPI* loci are provided in **Supplementary Figures 3 and 4**. The four other single  
299 nucleotide variants (SNVs) were located in regions previously identified as associated with  
300 HbA1c in trans-ethnic meta-analyses<sup>3</sup>: rs2971670 in *GCK* on chromosome 7 ( $P_{\text{meta}}=1.7 \times 10^{-9}$ ,

301 mainly associated in EA and AA,  $r^2=0.59$ ,  $D'=1$  with rs4607517, the index SNV in published  
302 GWAS), rs17476364 in *HK1* [MIM:142600] on chromosome 10 ( $P_{\text{meta}}=3.1 \times 10^{-21}$ , mainly  
303 associated in EA and HA,  $r^2=0.10$ ,  $D'=1$  with rs10823343,  $r^2=0.18$ ,  $D'=0.50$  with rs4745982,  
304 index SNVs in published GWAS), rs113373052 in *FN3K* [MIM:608425] /*FN3KRP*  
305 [MIM:611683] on chromosome 17 ( $P_{\text{meta}}=4.5 \times 10^{-10}$ , associated in EA,  $r^2=0.92$ ,  $D'=0.99$ , with  
306 rs1046896, index SNV in published GWAS) and rs1050828 in *G6PD* on chromosome X  
307 ( $P_{\text{meta}}=5.1 \times 10^{-210}$ , associated in AA and HA, monomorphic in the other ancestries)<sup>3</sup>. The top  
308 SNV in each region detected at the genome-wide threshold ( $P < 2 \times 10^{-8}$ ) is indicated in **Table 1**  
309 and at the sub-genome-wide threshold ( $P < 5 \times 10^{-7}$ ) in **Supplementary Table 5**.

310

### 311 **Classification of HbA1c-associated loci by their biological pathways**

312 Because loci that influence HbA1c through erythrocytic pathways are expected to cause  
313 nonglycemic variation in HbA1c, we sought to classify HbA1c-associated loci as ‘glycemic’ or  
314 ‘erythrocytic’ using mediation analyses and association analyses with glycemic and erythrocytic  
315 traits. Mediation analyses and look-up in WGS analysis of FG in TOPMed classified the *GCK*  
316 [MIM:138079] variants as glycemic (**Supplementary Tables 6, 7 & 8**). Association analyses  
317 with erythrocytic traits in published GWAS showed that rs17476364-C allele, in the *HK1* gene,  
318 was positively associated with HB, mean corpuscular volume (MCV), mean corpuscular  
319 hemoglobin (MCH), mean corpuscular hemoglobin concentration (MCHC), red blood cell count  
320 (RBC), hematocrit (HCT) and red blood cell distribution width (RDW) in EA<sup>15</sup> and that  
321 rs1050828-T allele, in the *G6PD* gene, was positively associated with MCH in AA and MCV in  
322 AA and HA and negatively associated with HCT and HB in AA, and RBC and RDW in AA and  
323 HA<sup>16-18</sup> (**Supplementary Tables 6, 8 and 9**). Results of the mediation and association analyses

324 are available in **Supplementary Tables 6, 8 and 9** for the genome-wide variants and  
325 **Supplementary Tables 7 and 10** for the sub-genome variants. Among the 26 variants meeting  
326 the sub-genome-wide threshold, four were common and 22 were low-frequency or rare. Two of  
327 the common HbA1c-associated variants were reported previously:<sup>3</sup> the glyceemic variant at  
328 *G6PC2* [MIM:608058] and the erythrocytic variant at *TMPRSS6* [MIM:609862]. Among the  
329 genome-wide significant loci, *HK1* (EA) and *G6PD* (AA and HA) were classified as  
330 ‘erythrocytic’, as was the low frequency variant rs1039215 in *HGB2/HBE1*, negatively  
331 associated with HB, HCT, MCV and MCH. The significant *FN3K/FN3KRP* and *XPNPEP1*  
332 variants were unclassified.

333

### 334 **Characterization of distinct signals at erythrocytic HbA1c-associated loci**

335 For loci classified as ‘erythrocytic’ (*HK1*, *HGB2/HBE1* and *G6PD*), we performed  
336 sequential conditional analyses to detect distinct signals in addition to the top SNV. The regions  
337 were defined as +/- 60kb region around *HK1*, +/- 250kb region around *HGB2/HBE1* and +/-  
338 500kb region around *G6PD*, based on Linkage Disequilibrium (LD) plots (**Supplementary**  
339 **Figures 3, 5 and 6**). We did not detect secondary associations in the *HK1* and *HGB2/HBE1*  
340 regions at a threshold of  $4.3 \times 10^{-5}$  and  $8.5 \times 10^{-6}$  respectively. Interestingly, in the *G6PD* region,  
341 the top SNV (rs1050828, p.Val98Met, T-allele frequency 12% in AA, 2% in HA, 0% in EA and  
342 AS) was associated with lower HbA1c in both AA and HA. This SNV accounted for 23% of  
343 HbA1c variance in AA and 4% in HA. The LD in the *G6PD* region is complex, with a strong  
344 haplotype effect in AA and HA (**Figure 2**). By performing conditional analyses on the top SNV  
345 (rs1050828) we were able to detect an additional rare signal (G-allele frequency 0.5%) in AA  
346 (rs76723693, p.Leu353Pro,  $B_{\text{cond}}=-0.50$ ,  $P_{\text{cond}}=2.8 \times 10^{-15}$ ) that was distinct from rs1050828

347 ( $r^2=0.0006$ ,  $D'=1$ , **Figure 3**). The threshold to detect an additional signal was fixed to  $1.7 \times 10^{-5}$   
348 in AA and  $4.5 \times 10^{-5}$  in HA. The three other SNVs located in the same region that were sub-  
349 genome-wide significant in the main analysis (rs143745197, rs184539426 and rs189305788)  
350 were not significant after adjusting for both rs1050828 and rs76723693. We detected significant  
351 or suggestive associations using gene-based ( $P=9.7 \times 10^{-11}$ ) and burden tests ( $P=4.7 \times 10^{-5}$ ) when  
352 aggregating 15 missense rare variants with  $MAF \leq 1\%$  in *G6PD* (**Supplementary Table 11**). As  
353 association from SKAT was more significant than the association of rs76723693 from single-  
354 SNV association analysis, it suggested that several rare missense variants in *G6PD* were  
355 associated with HbA1c. We performed additional association and conditional analyses in *G6PD*  
356 for missense variants with  $10 < \text{minor allele count} < 20$ . In addition to rs76723693, one rare  
357 missense variant (rs5030872,  $MAF=0.002$ ) was suggestively associated with HbA1c ( $B=-0.64$ ,  
358  $P=3.4 \times 10^{-6}$ ) and became significantly associated with HbA1c when adjusting for both rs1050828  
359 and rs76723693 ( $B_{\text{cond}}=-0.71$ ,  $P_{\text{cond}}=1.3 \times 10^{-9}$ ).

360 The *HBG2/HBE1* new variant rs1039215 ( $P=2.0 \times 10^{-9}$ ) is located at 327 kb from the SCT  
361 variant rs334 ( $P=2.9 \times 10^{-8}$ ). A recent paper reported rs1039215 to be in LD ( $r^2 > 0.2$ ) with the  
362 SCT variant (rs334,  $r^2=0.24$ ,  $D'=-0.83$ ) and correlated with *HBG2* gene expression in whole  
363 blood.<sup>26</sup> To determine if rs1039215 was distinct from rs334, we calculated LD and performed  
364 conditional analyses. In TOPMed, rs1039215 was in modest LD with rs334 ( $r^2=0.30$ ,  $D'=0.88$ ,  
365 **Supplementary Figure 3**) and conditioning on rs334 attenuated its association (decrease in p-  
366 value from  $2.0 \times 10^{-9}$  to  $10^{-3}$ , **Supplementary Table 12**), suggesting that the association of  
367 rs1039215 with HbA1c may be explained by the SCT rs334 variant. Nevertheless, the haplotype  
368 rs334-A / rs1039215-G was more significantly associated with HbA1c than the haplotypes  
369 rs334-A / rs1039215-A and rs334-T / rs1039215-G (**Supplementary Table 13**). Thus, the



370 association of the new variant rs1039215 in *HBG2/HBE1* could be partially distinct from the  
371 known association at the SCT variant. In our AA sample, 12 individuals carried two copies of  
372 rs1050828-T allele and at least one copy of rs1039215-G allele and had a mean HbA1c of 4.60  
373 (0.41) versus 5.65 (0.39) for the 2,372 individuals that carried no risk allele at the two variants  
374 (**Supplementary Table 14**).

375

### 376 **HbA1c-lowering effects of *G6PD* variants in AA and HA**

377 In sex-stratified analyses in AA, the *G6PD* rs76723693 variant was associated with a  
378 decrease in HbA1c of 0.98%-units (95% CI 0.51–1.44) per allele in hemizygous men and 0.46%-  
379 units (95% CI 0.26–0.66) in heterozygous women; whereas, the *G6PD* rs1050828 variant was  
380 associated with a decrease in HbA1c of 0.88%-units (95% CI 0.81–0.95) per allele in  
381 hemizygous men and 0.34%-units (95% CI 0.30–0.39) in heterozygous women (**Table 2 and**  
382 **Figure 4**). We detected heterogeneity in effect sizes between males and females for rs1050828  
383 ( $P_{\text{het}}=0.008$ ) but not for rs76723693 ( $P_{\text{het}}=0.19$ ). In HA, the *G6PD* rs1050828 variant was  
384 associated with a decrease in HbA1c of 0.84%-units (95% CI 0.47–1.22) per allele in  
385 hemizygous men and 0.25%-units (95% CI 0.06–0.45) in heterozygous women (**Table 3 and**  
386 **Figure 4**). Upon adjusting on the sickle cell trait (SCT) variant, rs334, the association of these  
387 two SNVs did not attenuate (**Supplementary Table 12**).

388

### 389 **Population reclassification of diabetes diagnosis by *G6PD* variants**

390 To assess the potential public health impact of *G6PD* variants in AA, we designed a  
391 hypothetical scenario, using National Health and Nutrition Examination Survey (NHANES, see  
392 URL in the web resources section) 2015-2016, to estimate the number of African Americans

393 and Hispanics whose diagnosis of diabetes would have been missed if screened with a single  
394 HbA1c measurement using the 6.5% diagnostic threshold and if the effects of the two *G6PD*  
395 variants rs1050828 and rs76723693 were not accounted for. We restricted the NHANES analytic  
396 sample to adults aged  $\geq 18$  years who self-identified as Non-Hispanic Black or Mexican  
397 American/Other Hispanic respectively. In non-Hispanic Blacks (N=1,227), an estimated 2.32%  
398 with HbA1c  $< 6.5\%$ -units may be considered to have diabetes upon accounting for the effect size  
399 and observed allele frequency of the common *G6PD* variant, rs1050828. An additional 0.13%  
400 with HbA1c  $< 6.5\%$ -units may be considered to have diabetes upon accounting for the effect of  
401 the rare *G6PD* variant, rs76723693. In Mexican American/Other Hispanic (N=1,768), an  
402 additional 0.26% with HbA1c  $< 6.5\%$ -units may be considered to have diabetes due to the effect  
403 of rs1050828. According to the 2016 United States Census Bureau, approximately 30.14 and  
404 39.33 million adults identified themselves as African American and Hispanic adults respectively,  
405 suggesting that 740,000 African American adults, of which 40,000 would be attributed to the  
406 rare variant, rs76723693, and 100,000 Hispanic adults with diabetes would remain undiagnosed  
407 when screened by a single HbA1c measurement if this genetic information was not taken into  
408 account (**Supplementary Table 15**).

409

#### 410 **Replication of results in the UKBB**

411 We selected a total of 5,964 African-ancestry non-diabetic UKBB participants for  
412 replication. In this sample, 2,461 participants were males, mean age (SD) was 51.1 (7.7), and  
413 mean HbA1c (SD) was 5.50 (0.44). The four variants of interest (rs334 (SCT), rs1039215  
414 (HBG2), rs76723693 and rs1050828 (G6PD)) had good quality of imputation (info score  $> 0.50$ ,  
415 **Supplementary Table 16**). We observed significant and consistent associations of the two

416 *G6PD* variants with HbA1c (rs1050828-T, B=-0.36,  $P < 2.2 \times 10^{-16}$  and rs76723693-G, B=-0.21,  
417  $P=0.007$ , **Supplementary Table 16**). The association of the rare *G6PD* rs76723693-G variant  
418 was even more significant when both *G6PD* variants were in the model (B=-0.27,  $P=6.7 \times 10^{-5}$ ).  
419 We did not detect significant associations of *HBG2* and *SCT* variants with HbA1c in the UKBB.

420

## 421 **Discussion**

422 Through deep large-scale WGS association analysis in 10,338 individuals from four  
423 different ancestries and fine-mapping of HbA1c-associated loci, we identified common, low  
424 frequency and rare genetic variants that influence nonglycemic variation in HbA1c. We  
425 confirmed four known regions associated with HbA1c (the glycemic *GCK*, erythrocytic *HK1* and  
426 *G6PD*, and unclassified *FN3K/FN3KRP* regions) and discovered two new AA-specific low  
427 frequency or rare erythrocytic variants in *G6PD* (rs76723693) and *HBG2/HBE1* (rs1039215).  
428 The magnitude and direction of effect of the association of rs76723693 and rs1039215 with  
429 HbA1c was similar in the two largest TOPMed AA cohorts (JHS and MESA, **Supplementary**  
430 **Table 17**). The association of rs76723693 with HbA1c was replicated in UKBB African-  
431 ancestry participants. We detected significant association using gene-based test when  
432 aggregating rare missense variants in *G6PD*, indicating that others rare missense variants in  
433 *G6PD*, in addition to rs76723693, are associated with HbA1c. We showed that the association of  
434 the *HBG2/HBE1* variant with HbA1c was partially distinct from the known *SCT* rs334 variant in  
435 *HBB* [MIM:141900] suggesting that genetic variation at hemoglobin genes other than *HBB* may  
436 also influence HbA1c. Individuals carrying both the *G6PD* variant (rs1050828) and the  
437 *HBG2/HBE1* variant (rs1039215) had even lower HbA1c than those carrying only one of the two  
438 variants. Hemizygous males and homozygous females for the *G6PD* rs1050828-T allele who

439 carried one or more copies of the *HBG2* rs1039215-G allele had a mean HbA1c that was 1.05%-  
440 unit lower than those carrying none of these alleles.

441 The novel HbA1c variant in AA, rs1039215 on chromosome 11, lies in an intron of the  
442 hemoglobin subunit gamma 2 gene *HBG2* and the hemoglobin subunit epsilon 1 gene *HBE1*.  
443 *HBG2*, in addition to *HBG1*, encodes the gamma chain of hemoglobin, which combines with 2  
444 alpha chains to form fetal hemoglobin. Fetal hemoglobin is known to interfere with the  
445 measurement of HbA1c by some laboratory assays,<sup>27-29</sup> and so persistence of fetal hemoglobin  
446 may be a mechanism through which rs1039215 influences HbA1c measurements. While a small  
447 degree of analytic interference with SCT has been reported for the Tosoh 2.2 and G7 assays used  
448 by JHS, MESA, and ARIC to measure HbA1c (see NGSP website URL in the web resources  
449 section),<sup>30, 31</sup> no interference has been reported for the Bio-Rad Variant II Turbo assay used by  
450 UKB<sup>32</sup> (**Supplementary Table 2**). Thus, assay interference may explain the lack of association  
451 of rs334 with HbA1c in UKBB. Alternatively, as our haplotype analysis indicated that the  
452 haplotype containing both rs334-A in *HBB* and rs1039215-G in *HBG2* was likely the main driver  
453 of this signal in the region, the true causal variant could be another variant within this haplotype  
454 that partially explains the reported association of rs334 with HbA1c.

455 Both variants identified in *G6PD* in AA are missense and pathogenic variants for G6PD  
456 deficiency (ClinVar), an X-linked genetic disorder characterized by a defect glucose-6-phosphate  
457 dehydrogenase enzymatic action, causing erythrocytes to break down prematurely. Thus, the  
458 mechanism through which these *G6PD* variants lower HbA1c is most likely through shortening  
459 of erythrocytic lifespan (**Supplementary Table 18**). Assuming random X-inactivation, we  
460 would expect the difference between hemizygous males and no rs1050828-T variant to be two  
461 times larger than the difference between heterozygous females and no rs1050828-T variant;

462 however, in this study, we observed a slightly lower than expected effect in females. We posit  
463 that this heterogeneity of genetic effects by sex may be due to X-linked dosage compensation  
464 and not actual sex differences.<sup>33</sup> While these *G6PD* variants lower HbA1c in AA, similar to  
465 sickle cell trait,<sup>5</sup> we note that the lowering effect of these genetic variants on HbA1c do not  
466 explain the higher mean HbA1c in AA compared to European American with similar glycemia  
467 that has been reported in observational studies.<sup>34, 35</sup>

468 We found that rs1050828, the common *G6PD* variant in AA, was also associated with  
469 HbA1c in HA (sample composed of 51% Mexican, 14% Dominican, 14% Puerto Rican, 11%  
470 South American, and 10% others) suggesting that carriers of this variant are likely to be  
471 underdiagnosed if a single HbA1c measurement is used to screen two of the largest racial/ethnic  
472 minorities in the United States for diabetes. If *G6PD* variants were ignored, we estimate that  
473 approximately 840,000 African American and Hispanic adults with diabetes would remain  
474 undiagnosed. As Hispanic populations are ancestrally diverse including African Ancestry (~7%  
475 of HA in our study have > 50% AA ancestry and ~25% have > 15% AA ancestry), *G6PD*  
476 variants were expected to occur at some lower frequency in HA compared to AA. Given that  
477 there is no universal screening for G6PD deficiency in North America, asymptomatic carriers are  
478 unlikely to know their G6PD status.<sup>7</sup> While misclassification of diabetes status at the population  
479 level was largely driven by the common G6PD variant, rs10105828, and not the rare rs76723693  
480 variant (0.5% of the AA population), in this era of precision medicine there is a growing need for  
481 clinical practice to account for the impact of rare genetic variants with clinically meaningful  
482 effects on routinely performed diagnostic tests even if the proportion of carriers in the population  
483 is small. We also predict that other *G6PD* deficiency variants, particularly common in African,  
484 Mediterranean and Asian populations,<sup>36</sup> will impact HbA1c's utility as a diagnostic measure.

485 Until genetic information is universally accessible to adjust diagnostic thresholds of imperfect  
486 biomarkers, our findings support current clinical practice guidelines by the American Diabetes  
487 Association which recommends the use of both FG and HbA1c in combination for diabetes  
488 diagnosis, especially given that the diagnostic level of HbA1c is conservative relative to FG.<sup>37</sup>

489 Strengths of this investigation include the analysis of extremely high-quality deep  
490 sequence data from a large, multi-ancestry sample including five studies and four ancestries to  
491 investigate the association of genetic variation across the full allelic spectrum with HbA1c, a  
492 diagnostic test that is central to the care of patients with diabetes. As previous GWAS on HbA1c  
493 had included a smaller sample of Hispanic ancestry, this study represents one of the first large-  
494 scale genetic discovery efforts for HbA1c that include multiple ethnic minorities in the United  
495 States. Our study demonstrates that both common and rare genetic variation differ across  
496 ancestries and informs the unique genetic architecture of HbA1c. We acknowledge limitations.  
497 Our hypothetical scenario using NHANES data to assess the population impact of *G6PD*  
498 genetics on diabetes screening does not take into account the full complement of clinical and  
499 genetic information contributing to nonglycemic variation in HbA1c, some of which may raise,  
500 and not lower, HbA1c reducing the risk of under-detection.<sup>38</sup> For instance, structural variants  
501 (e.g., copy number variation) were not included in our analyses. Nevertheless, our findings  
502 highlight the potential for underdiagnosis in carriers of these variants, which disproportionately  
503 affect certain ethnic minorities, if HbA1c is used as the only diagnostic test for diabetes. Our  
504 sample sizes, and thus our power, are limited compared to GWAS, particularly for Hispanic and  
505 Asian populations. For instance, we did not detect an association signal for rs76723693 in HA  
506 because only one individual in our HA population carried a copy of the rare variant. Including  
507 larger samples of individuals of non-European ancestries will improve the characterization of

508 rare variants with clinically meaningful effects on HbA1c. We acknowledge that the genome-  
509 wide threshold used in this paper may not represent the true number of independent genetic  
510 variants (SNVs as well as insertion-deletion variants) tested using our sequence data.

511 In this study we identified common and rare genetic variants that cause nonglycemic  
512 differences in HbA1c with important clinical and public health implications. Because HbA1c is  
513 commonly used in diabetes screening and management worldwide, disregarding the effects of  
514 these rare and common genetic variants that tend to occur in high diabetes-risk minority groups,  
515 could result in delayed diagnosis or under-detection of diabetes in carriers of these variants. To  
516 avoid such disparities in care, an assessment of these variants should be considered for  
517 incorporation into precision medicine approaches for diabetes diagnosis.

518

## 519 **Supplementary Data**

520 Supplemental data contains cohort descriptions, 18 tables and 6 figures.

521

## 522 **Acknowledgements**

### 523 **Whole genome sequencing:**

524 Whole genome sequencing (WGS) for the Trans-Omics in Precision Medicine (TOPMed)  
525 program was supported by the National Heart, Lung and Blood Institute (NHLBI). WGS for  
526 "NHLBI TOPMed: Genetics of Cardiometabolic Health in the Amish (phs000956.v1.p1) was  
527 performed at the Broad Institute of MIT and Harvard (3R01HL121007-01S1). WGS for "NHLBI  
528 TOPMed: Trans-Omics for Precision Medicine Whole Genome Sequencing Project: ARIC  
529 (phs001211.v1.p1) was performed at the Broad Institute of MIT and Harvard and at the Baylor  
530 Human Genome Sequencing Center (3R01HL092577-06S1 (Broad, AFGen),

531 HHSN268201500015C (Baylor, VTE), 3U54HG003273-12S2 (Baylor, VTE)). WGS for  
532 "NHLBI TOPMed: Whole Genome Sequencing and Related Phenotypes in the Framingham  
533 Heart Study (phs000974.v1.p1) was performed at the Broad Institute of MIT and Harvard  
534 (3R01HL092577-06S1 (AFGen)). WGS for "NHLBI TOPMed: The Jackson Heart Study  
535 (phs000964.v1.p1) was performed at the University of Washington Northwest Genomics Center  
536 (HHSN268201100037C). WGS for "NHLBI TOPMed: MESA and MESA Family AA-CAC  
537 (phs001416) was performed at the Broad Institute of MIT and Harvard (3U54HG003067-13S1  
538 (MESA, TOPMed supplement to NHGRI), HHSN268201500014C (Broad, AA\_CAC)). WGS  
539 for "NHLBI TOPMed: Cardiovascular Health Study (phs001368.v1.p1)" was performed at  
540 Baylor Human Genome Sequencing Center (HHSN268201500015C, VTE portion of CHS).  
541 WGS for "NHLBI TOPMed: GeneSTAR (Genetic Study of Atherosclerosis Risk)  
542 (phs001218.v1.p1)" was performed at Macrogen Corp and at the Broad Institute of MIT and  
543 Harvard (HHSN268201500014C (Broad, AA\_CAC)). WGS for "NHLBI TOPMed: Women's  
544 Health Initiative (WHI) (phs001237.v1.p1)" was performed at the Broad Institute of MIT and  
545 Harvard (HHSN268201500014C). WGS for "NHLBI TOPMed: San Antonio Family Heart  
546 Study (WGS) (phs001215.v1.p1)" was performed at Illumina Genomic Services  
547 (3R01HL113323-03S1). Centralized read mapping and genotype calling, along with variant  
548 quality metrics and filtering were provided by the TOPMed Informatics Research Center  
549 (3R01HL-117626-02S1). Phenotype harmonization, data management, sample-identity QC, and  
550 general study coordination, were provided by the TOPMed Data Coordinating Center (3R01HL-  
551 120393-02S1). We gratefully acknowledge the studies and participants who provided biological  
552 samples and data for TOPMed. The contributions of the investigators of the NHLBI TOPMed  
553 Consortium (<https://www.nhlbiwgs.org/topmed-banner-authorship>) are gratefully acknowledged.



554 **The Amish study**

555 NIH grant R01 HL121007

556 **The Atherosclerosis Risk in Communities Study**

557 Whole genome sequencing (WGS) for the Trans-Omics in Precision Medicine (TOPMed)  
558 program was supported by the National Heart, Lung and Blood Institute (NHLBI). WGS for  
559 “NHLBI TOPMed: Atherosclerosis Risk in Communities (ARIC)” (phs001211) was performed  
560 at the Baylor College of Medicine Human Genome Sequencing Center (HHSN268201500015C  
561 and 3U54HG003273-12S2) and the Broad Institute for MIT and Harvard (3R01HL092577-  
562 06S1). Centralized read mapping and genotype calling, along with variant quality metrics and  
563 filtering were provided by the TOPMed Informatics Research Center (3R01HL-117626-02S1).  
564 Phenotype harmonization, data management, sample-identity QC, and general study  
565 coordination, were provided by the TOPMed Data Coordinating Center (3R01HL-120393-02S1).  
566 We gratefully acknowledge the studies and participants who provided biological samples and  
567 data for TOPMed.

568 The Atherosclerosis Risk in Communities study has been funded in whole or in part with Federal  
569 funds from the National Heart, Lung, and Blood Institute, National Institutes of Health,  
570 Department of Health and Human Services (contract numbers HHSN268201700001I,  
571 HHSN268201700002I, HHSN268201700003I, HHSN268201700004I and  
572 HHSN268201700005I). The authors thank the staff and participants of the ARIC study for their  
573 important contributions.

574 **The Cardiovascular Health Study**

575 This research was supported by contracts HHSN268201200036C, HHSN268200800007C,  
576 HHSN268201800001C, N01HC55222, N01HC85079, N01HC85080, N01HC85081,

577 N01HC85082, N01HC85083, N01HC85086, and grants R01HL120393, U01HL080295 and  
578 U01HL130114 from the National Heart, Lung, and Blood Institute (NHLBI), with additional  
579 contribution from the National Institute of Neurological Disorders and Stroke (NINDS).  
580 Additional support was provided by R01AG023629 from the National Institute on Aging (NIA).  
581 A full list of principal CHS investigators and institutions can be found at CHS-NHLBI.org.

### 582 **The Framingham Heart Study**

583 This research was conducted in part using data and resources from the Framingham Heart Study  
584 of the National Heart Lung and Blood Institute of the National Institutes of Health and Boston  
585 University School of Medicine. The Framingham Heart Study (FHS) acknowledges the support  
586 of contracts NO1-HC-25195 and HHSN268201500001I from the National Heart, Lung and  
587 Blood Institute, contract 75N92019D00031 and grant supplement R01 HL092577-06S1 for this  
588 research. This work was also supported in part by grant U01DK078616.

589 We also acknowledge the dedication of the FHS study participants without whom this research  
590 would not be possible.

### 591 **The Genetic Studies of Atherosclerosis Risk**

592 GeneSTAR was supported by the National Institutes of Health/National Heart, Lung, and Blood  
593 Institute (U01 HL72518, HL087698, HL112064, HL11006, HL118356) and by a grant from the  
594 National Institutes of Health/National Center for Research Resources (M01-RR000052) to the  
595 Johns Hopkins General Clinical Research Center. We would like to thank the participants and  
596 families of GeneSTAR and our dedicated staff for all their sacrifices.

### 597 **The Jackson Heart Study**

598 The Jackson Heart Study (JHS) is supported and conducted in collaboration with Jackson State  
599 University (HHSN268201800013I), Tougaloo College (HHSN268201800014I), the Mississippi

600 State Department of Health (HHSN268201800015I/HHSN26800001) and the University of  
601 Mississippi Medical Center (HHSN268201800010I, HHSN268201800011I and  
602 HHSN268201800012I) contracts from the National Heart, Lung, and Blood Institute (NHLBI)  
603 and the National Institute for Minority Health and Health Disparities (NIMHD). The authors also  
604 wish to thank the staffs and participants of the JHS.

605 The views expressed in this manuscript are those of the authors and do not necessarily represent  
606 the views of the National Heart, Lung, and Blood Institute; the National Institutes of Health; or  
607 the U.S. Department of Health and Human Services.

### 608 **The Multi-Ethnic Study of Atherosclerosis**

609 Whole genome sequencing (WGS) for the Trans-Omics in Precision Medicine (TOPMed)  
610 program was supported by the National Heart, Lung and Blood Institute (NHLBI). WGS for  
611 “NHLBI TOPMed: Multi-Ethnic Study of Atherosclerosis (MESA)” (phs001416.v1.p1) was  
612 performed at the Broad Institute of MIT and Harvard (3U54HG003067-13S1). Centralized read  
613 mapping and genotype calling, along with variant quality metrics and filtering were provided by  
614 the TOPMed Informatics Research Center (3R01HL-117626-02S1). Phenotype harmonization,  
615 data management, sample-identity QC, and general study coordination, were provided by the  
616 TOPMed Data Coordinating Center (3R01HL-120393-02S1). MESA and the MESA SHARe  
617 project are conducted and supported by the National Heart, Lung, and Blood Institute (NHLBI)  
618 in collaboration with MESA investigators. Support for MESA is provided by contracts  
619 HHSN268201500003I, N01-HC-95159, N01-HC-95160, N01-HC-95161, N01-HC-95162, N01-  
620 HC-95163, N01-HC-95164, N01-HC-95165, N01-HC-95166, N01-HC-95167, N01-HC-95168,  
621 N01-HC-95169, UL1-TR-000040, UL1-TR-001079, UL1-TR-001420. The provision of  
622 genotyping data was supported in part by the National Center for Advancing Translational

623 Sciences, CTSI grant UL1TR001881, and the National Institute of Diabetes and Digestive and  
624 Kidney Disease Diabetes Research Center (DRC) grant DK063491 to the Southern California  
625 Diabetes Endocrinology Research Center.

### 626 **The San Antonio Family Study**

627 Collection of the San Antonio Family Study data was supported in part by National Institutes of  
628 Health (NIH) grants R01 HL045522, DK047482, DK053889, MH078143, MH078111 and  
629 MH083824; and whole genome sequencing of SAFS subjects was supported by U01 DK085524  
630 and R01 HL113323. This work was conducted in part in facilities constructed under the support  
631 of NIH grant C06 RR020547. We are very grateful to the participants of the San Antonio Family  
632 Study for their continued involvement in our research programs.

### 633 **The Women's Health Initiative**

634 The WHI program is funded by the National Heart, Lung, and Blood Institute, National Institutes  
635 of Health, U.S. Department of Health and Human Services through contracts  
636 HHSN268201600018C, HHSN268201600001C, HHSN268201600002C,  
637 HHSN268201600003C, and HHSN268201600004C. The authors thank the WHI investigators  
638 and staff for their dedication, and the study participants for making the program possible. A full  
639 listing of WHI investigators can be found at:  
640 [http://www.whi.org/researchers/Documents%20%20Write%20a%20Paper/WHI%20Investigator](http://www.whi.org/researchers/Documents%20%20Write%20a%20Paper/WHI%20Investigator%20Long%20List.pdf)  
641 [%20Long%20List.pdf](http://www.whi.org/researchers/Documents/Documents%20%20Write%20a%20Paper/WHI%20Investigator%20Long%20List.pdf)

### 642 **UKBB**

643 This research has been conducted using the UK Biobank Resource under Application Number  
644 42614.

645

646 **Web Resources**

647 Analysis Commons: <http://analysiscommons.com>

648 EPACTS: <https://genome.sph.umich.edu/wiki/EPACTS>

649 HbA1c Assay Interferences information on the National Glycohemoglobin Standardization

650 Program (NGSP) website: <http://www.ngsp.org/interf.asp>

651 National Health and Nutrition Examination Survey (NHANES):

652 <https://www.cdc.gov/nchs/nhanes/continuousnhanes/default.aspx?BeginYear=2015>

653 OASIS: <https://omicsoasis.github.io>

654 SmartPCA: <http://www.hsph.harvard.edu/alkes-price/software>

655 TOPMed Pipeline: [https://github.com/UW-GAC/analysis\\_pipeline](https://github.com/UW-GAC/analysis_pipeline)

656 TOPMed website: [www.nhlbiwgs.org](http://www.nhlbiwgs.org)

657 Details regarding TOPMed laboratory methods, data processing and quality control:

658 <https://www.nhlbiwgs.org/methods>

659 UK Biobank: <https://www.ukbiobank.ac.uk/>

660

661 **Funding**

662 LMR is funded by T32 HL129982.

663 AKM is supported by K01 DK107836 and R03 DK118305.

664 PSdV is supported by American Heart Association Grant 18CDA34110116.

665 JBM and the project supported by K24 DK080140, U01 DK078616 and U01 DK105554

666 Opportunity Pool OP6.

667 The Analysis Commons was funded by R01HL131136.

668 HMH was supported by NHLBI training grants T32 HL007055 and T32 HL129982, and  
669 American Diabetes Association Grant #1-19-PDF-045.

### 670 **Declarations of Interest**

671 The authors have no conflict of interest to declare.

672 The views expressed in this manuscript are those of the authors and do not necessarily represent  
673 the views of the National Heart, Lung, and Blood Institute; the National Institutes of Health; or  
674 the U.S. Department of Health and Human Services.

675

### 676 **References**

- 677 1. Mortensen, H.B., Christophersen, C. (1983). Glucosylation of human haemoglobin a in red  
678 blood cells studied in vitro. Kinetics of the formation and dissociation of haemoglobin A1c. *Clin.*  
679 *Chim. Acta 134*, 317-326.
- 680 2. Leong, A., Meigs, J.B. (2015). Type 2 Diabetes Prevention: Implications of Hemoglobin A1c  
681 Genetics. *Rev. Diabet. Stud. 12*, 351-362.
- 682 3. Wheeler, E., Leong, A., Liu, C.T., Hivert, M.F., Strawbridge, R.J., Podmore, C., Li, M., Yao,  
683 J., Sim, X., Hong, J. et al. (2017). Impact of common genetic determinants of Hemoglobin A1c  
684 on type 2 diabetes risk and diagnosis in ancestrally diverse populations: A transethnic genome-  
685 wide meta-analysis. *PLoS Med. 14*, e1002383.
- 686 4. International HapMap Consortium, Frazer, K.A., Ballinger, D.G., Cox, D.R., Hinds, D.A.,  
687 Stuve, L.L., Gibbs, R.A., Belmont, J.W., Boudreau, A., Hardenbol, P. et al. (2007). A second  
688 generation human haplotype map of over 3.1 million SNPs. *Nature 449*, 851-861.

- 689 5. Lacy, M.E., Wellenius, G.A., Sumner, A.E., Correa, A., Carnethon, M.R., Liem, R.I., Wilson,  
690 J.G., Sacks, D.B., Jacobs, D.R., Jr, Carson, A.P. et al. (2017). Association of Sickle Cell Trait  
691 With Hemoglobin A1c in African Americans. *JAMA* 317, 507-515.
- 692 6. Strickland, S.W., Campbell, S.T., Little, R.R., Bruns, D.E., Bazydlo, L.A.L. (2018).  
693 Recognition of rare hemoglobin variants by hemoglobin A1c measurement procedures. *Clin.*  
694 *Chim. Acta* 476, 67-74.
- 695 7. Leong, A. (2007). Is there a need for neonatal screening of glucose-6-phosphate  
696 dehydrogenase deficiency in Canada? *Mcgill J. Med.* 10, 31-34.
- 697 8. Motulsky, A.G., Stamatoyannopoulos, G. (1966). Clinical implications of glucose-6-  
698 phosphate dehydrogenase deficiency. *Ann. Intern. Med.* 65, 1329-1334.
- 699 9. Paterson, A.D. (2017). HbA1c for type 2 diabetes diagnosis in Africans and African  
700 Americans: Personalized medicine NOW! *PLoS Med.* 14, e1002384.
- 701 10. Little, R.R., Rohlfing, C.L., Sacks, D.B., National Glycohemoglobin Standardization  
702 Program (NGSP) Steering Committee. (2011). Status of hemoglobin A1c measurement and goals  
703 for improvement: from chaos to order for improving diabetes care. *Clin. Chem.* 57, 205-214.
- 704 11. Regier, A.A., Farjoun, Y., Larson, D.E., Krasheninina, O., Kang, H.M., Howrigan, D.P.,  
705 Chen, B.J., Kher, M., Banks, E., Ames, D.C. et al. (2018). Functional equivalence of genome  
706 sequencing analysis pipelines enables harmonized variant calling across human genetics projects.  
707 *Nat. Commun.* 9, 4038-018-06159-4.
- 708 12. Brody, J.A., Morrison, A.C., Bis, J.C., O'Connell, J.R., Brown, M.R., Huffman, J.E., Ames,  
709 D.C., Carroll, A., Conomos, M.P., Gabriel, S. et al. (2017). Analysis commons, a team approach  
710 to discovery in a big-data environment for genetic epidemiology. *Nat. Genet.* 49, 1560-1563.

- 711 13. Kanai, M., Tanaka, T., Okada, Y. (2016). Empirical estimation of genome-wide significance  
712 thresholds based on the 1000 Genomes Project data set. *J. Hum. Genet.* *61*, 861-866.
- 713 14. Xu, C., Tachmazidou, I., Walter, K., Ciampi, A., Zeggini, E., Greenwood, C.M., UK10K  
714 Consortium. (2014). Estimating genome-wide significance for whole-genome sequencing  
715 studies. *Genet. Epidemiol.* *38*, 281-290.
- 716 15. Astle, W.J., Elding, H., Jiang, T., Allen, D., Ruklisa, D., Mann, A.L., Mead, D., Bouman, H.,  
717 Riveros-Mckay, F., Kostadima, M.A. et al. (2016). The Allelic Landscape of Human Blood Cell  
718 Trait Variation and Links to Common Complex Disease. *Cell* *167*, 1415-1429.e19.
- 719 16. Hodonsky, C.J., Jain, D., Schick, U.M., Morrison, J.V., Brown, L., McHugh, C.P.,  
720 Schurmann, C., Chen, D.D., Liu, Y.M., Auer, P.L. et al. (2017). Genome-wide association study  
721 of red blood cell traits in Hispanics/Latinos: The Hispanic Community Health Study/Study of  
722 Latinos. *PLoS Genet.* *13*, e1006760.
- 723 17. Chen, Z., Tang, H., Qayyum, R., Schick, U.M., Nalls, M.A., Handsaker, R., Li, J., Lu, Y.,  
724 Yanek, L.R., Keating, B. et al. (2013). Genome-wide association analysis of red blood cell traits  
725 in African Americans: the COGENT Network. *Hum. Mol. Genet.* *22*, 2529-2538.
- 726 18. Lo, K.S., Wilson, J.G., Lange, L.A., Folsom, A.R., Galarneau, G., Ganesh, S.K., Grant, S.F.,  
727 Keating, B.J., McCarroll, S.A., Mohler, E.R., 3rd et al. (2011). Genetic association analysis  
728 highlights new loci that modulate hematological trait variation in Caucasians and African  
729 Americans. *Hum. Genet.* *129*, 307-317.
- 730 19. Chami, N., Chen, M.H., Slater, A.J., Eicher, J.D., Evangelou, E., Tajuddin, S.M., Love-  
731 Gregory, L., Kacprowski, T., Schick, U.M., Nomura, A. et al. (2016). Exome Genotyping  
732 Identifies Pleiotropic Variants Associated with Red Blood Cell Traits. *Am. J. Hum. Genet.* *99*, 8-  
733 21.



- 734 20. Willer, C.J., Li, Y., Abecasis, G.R. (2010). METAL: fast and efficient meta-analysis of  
735 genomewide association scans. *Bioinformatics* 26, 2190-2191.
- 736 21. Liu, X., White, S., Peng, B., Johnson, A.D., Brody, J.A., Li, A.H., Huang, Z., Carroll, A.,  
737 Wei, P., Gibbs, R. et al. (2016). WGS: an annotation pipeline for human genome sequencing  
738 studies. *J. Med. Genet.* 53, 111-112.
- 739 22. Bycroft, C., Freeman, C., Petkova, D., Band, G., Elliott, L.T., Sharp, K., Motyer, A.,  
740 Vukcevic, D., Delaneau, O., O'Connell, J. et al. (2018). The UK Biobank resource with deep  
741 phenotyping and genomic data. *Nature* 562, 203-209.
- 742 23. Patterson, N., Price, A.L., Reich, D. (2006). Population structure and eigenanalysis. *PLoS*  
743 *Genet.* 2, e190.
- 744 24. Price, A.L., Patterson, N.J., Plenge, R.M., Weinblatt, M.E., Shadick, N.A., Reich, D. (2006).  
745 Principal components analysis corrects for stratification in genome-wide association studies. *Nat.*  
746 *Genet.* 38, 904-909.
- 747 25. Purcell, S., Neale, B., Todd-Brown, K., Thomas, L., Ferreira, M.A., Bender, D., Maller, J.,  
748 Sklar, P., de Bakker, P.I., Daly, M.J. et al. (2007). PLINK: a tool set for whole-genome  
749 association and population-based linkage analyses. *Am. J. Hum. Genet.* 81, 559-575.
- 750 26. Shriner, D., Rotimi, C.N. (2018). Whole-Genome-Sequence-Based Haplotypes Reveal Single  
751 Origin of the Sickle Allele during the Holocene Wet Phase. *Am. J. Hum. Genet.* 102, 547-556.
- 752 27. Little, R.R., Roberts, W.L. (2009). A review of variant hemoglobins interfering with  
753 hemoglobin A1c measurement. *J. Diabetes Sci. Technol.* 3, 446-451.
- 754 28. Rohlfing, C.L., Connolly, S.M., England, J.D., Hanson, S.E., Moellering, C.M., Bachelder,  
755 J.R., Little, R.R. (2008). The effect of elevated fetal hemoglobin on hemoglobin A1c results: five

756 common hemoglobin A1c methods compared with the IFCC reference method. *Am. J. Clin.*  
757 *Pathol.* *129*, 811-814.

758 29. Sarnowski, C., Hivert, M.F. (2018). Impact of Genetic Determinants of HbA1c on Type 2  
759 Diabetes Risk and Diagnosis. *Curr. Diab Rep.* *18*, 52-018-1022-4.

760 30. Roberts, W.L., Safar-Pour, S., De, B.K., Rohlfing, C.L., Weykamp, C.W., Little, R.R.  
761 (2005). Effects of hemoglobin C and S traits on glycohemoglobin measurements by eleven  
762 methods. *Clin. Chem.* *51*, 776-778.

763 31. Rohlfing, C., Hanson, S., Little, R.R. (2017). Measurement of Hemoglobin A1c in Patients  
764 With Sickle Cell Trait. *JAMA* *317*, 2237.

765 32. Mongia, S.K., Little, R.R., Rohlfing, C.L., Hanson, S., Roberts, R.F., Owen, W.E., D'Costa,  
766 M.A., Reyes, C.A., Luzzi, V.I., Roberts, W.L. (2008). Effects of hemoglobin C and S traits on  
767 the results of 14 commercial glycated hemoglobin assays. *Am. J. Clin. Pathol.* *130*, 136-140.

768 33. Sidorenko, J., Kassam, I., Kemper, K., Zeng, J., Lloyd-Jones, L., Montgomery, G.W.,  
769 Gibson, G., Metspalu, A., Esko, T., Yang, J. et al. (2018). The effect of X-linked dosage  
770 compensation on complex trait variation. *bioRxiv*.

771 34. Bergenstal, R.M., Gal, R.L., Connor, C.G., Gubitosi-Klug, R., Kruger, D., Olson, B.A.,  
772 Willi, S.M., Aleppo, G., Weinstock, R.S., Wood, J. et al. (2017). Racial Differences in the  
773 Relationship of Glucose Concentrations and Hemoglobin A1c Levels. *Ann. Intern. Med.* *167*,  
774 95-102.

775 35. Ziemer, D.C., Kolm, P., Weintraub, W.S., Vaccarino, V., Rhee, M.K., Twombly, J.G.,  
776 Narayan, K.M., Koch, D.D., Phillips, L.S. (2010). Glucose-independent, black-white differences  
777 in hemoglobin A1c levels: a cross-sectional analysis of 2 studies. *Ann. Intern. Med.* *152*, 770-  
778 777.

- 779 36. Gomez-Manzo, S., Marcial-Quino, J., Vanoye-Carlo, A., Serrano-Posada, H., Ortega-  
780 Cuellar, D., Gonzalez-Valdez, A., Castillo-Rodriguez, R.A., Hernandez-Ochoa, B., Sierra-  
781 Palacios, E., Rodriguez-Bustamante, E. et al. (2016). Glucose-6-Phosphate Dehydrogenase:  
782 Update and Analysis of New Mutations around the World. *Int. J. Mol. Sci.* *17*,  
783 10.3390/ijms17122069.
- 784 37. American Diabetes Association. (2019). 2. Classification and Diagnosis of Diabetes:  
785 Standards of Medical Care in Diabetes-2019. *Diabetes Care* *42*, S13-S28.
- 786 38. Jun, G., Sedlazeck, F.J., Chen, H., Yu, B., Qi, Q., Krasheninina, O., Carroll, A., Liu, X.,  
787 Mansfield, A., Zarate, S. et al. (2018). **PgmNr 3186/W: Identification of novel structural**  
788 **variations affecting common and complex disease risks with >16,000 whole genome**  
789 **sequences from ARIC and HCHS/SOL.**
- 790
- 791

792 **Figure Legends:**

793 **Figure 1:** Manhattan-plots of the meta-analysis of HbA1c in non-diabetic individuals in  
794 TOPMed cohorts. The  $-\log_{10}(\text{P-value})$  for each single nucleotide variant on the y-axis is plotted  
795 against the build 38 genomic position on the x-axis (chromosomal coordinate). The dashed  
796 horizontal line indicates the genome-wide significance threshold of  $P = 2 \times 10^{-8}$ . The y-axis was  
797 truncated for ease of interpretation.

798 **Figure 2:** Regional HbA1c association plots in the *G6PD* region in non-diabetic African-  
799 Americans and Hispanics in TOPMed cohorts. Association plots are displayed separately in  
800 African-Americans (left-side) and in Hispanics (right-side). Single nucleotide variants are plotted  
801 with their P-values ( $-\log_{10}$  values, y-axis) as a function of build 38 genomic position on  
802 chromosome X (x-axis). The local linkage disequilibrium (LD) structure ( $r^2$  - top or  $D'$  - bottom)  
803 between the top associated single nucleotide variant rs1050828 (red triangle) and correlated  
804 proxies is indicated in color according to a blue to red scale from  $r^2/D' = 0$  to 1 and was  
805 calculated separately in non-diabetic African-Americans and Hispanics TOPMed cohorts.

806 **Figure 3:** Sequential conditional analyses in the *G6PD* region in non-diabetic African-  
807 Americans and Hispanics in TOPMed cohorts. Association plots are displayed separately in  
808 African-Americans (left-side) and in Hispanics (right-side). Single nucleotide variants are plotted  
809 with their P-values ( $-\log_{10}$  values, y-axis) as a function of build 38 genomic position on  
810 chromosome X (x-axis). The local linkage disequilibrium (LD) structure ( $r^2$  - top or  $D'$  - bottom)  
811 between the top associated single nucleotide variant (red triangle) and correlated proxies is  
812 indicated in color according to a blue to red scale from  $r^2/D' = 0$  to 1 and was calculated  
813 separately in non-diabetic African-Americans and Hispanics TOPMed cohorts. Significance  
814 thresholds to declare an association signal as distinct are indicated by a red line ( $P = 1.7 \times 10^{-5}$  in

815 African-Americans and  $P=4.5\times 10^{-5}$  in Hispanics, based on the number of single nucleotide  
816 variants in the region with a minor allele count greater than 20).

817 **Figure 4:** Mean HbA1c levels according to genotypes at both *G6PD* variants (rs76723693 and  
818 rs1050828) and stratified by sex. Plots are displayed separately in African-Americans (left and  
819 center) and in Hispanics (right). Due to the limited sample size of African-Americans women  
820 carrying two copies of the rare G allele at rs76723693, they are not represented on this plot. In  
821 AA, the *G6PD* rs76723693 variant was associated with a decrease in HbA1c of 0.98%-units  
822 (95% Confidence Interval (CI) 0.51–1.44) per allele in hemizygous men and 0.46%-units (95%  
823 CI 0.26–0.66) in heterozygous women; whereas, the *G6PD* rs1050828 variant was associated  
824 with a decrease in HbA1c of 0.88%-units (95% CI 0.81–0.95) per allele in hemizygous men and  
825 0.34%-units (95% CI 0.30–0.39) in heterozygous women In HA, the *G6PD* rs1050828 variant  
826 was associated with a decrease in HbA1c of 0.84%-units (95% CI 0.47–1.22) per allele in  
827 hemizygous men and 0.25%-units (95% CI 0.06–0.45) in heterozygous women.

828 **Figure 1:** Manhattan-plots of the meta-analysis of HbA1c in non-diabetic individuals in TOPMed cohorts.

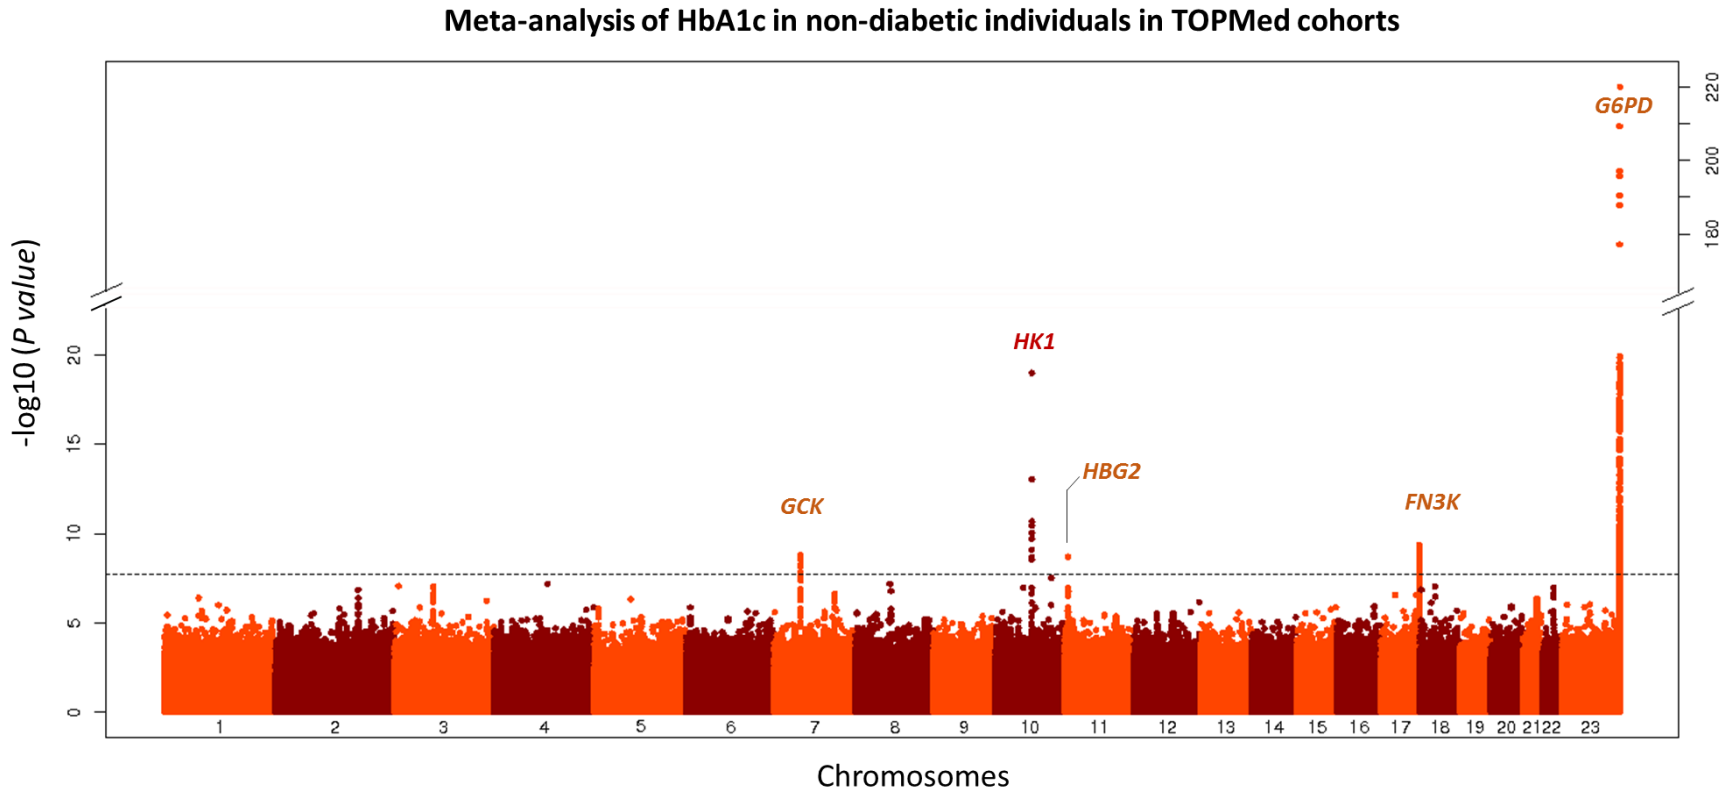

829

830 The  $-\log_{10}(P\text{-value})$  for each single nucleotide variant on the y-axis is plotted against the build 38 genomic position on the x-axis  
831 (chromosomal coordinate). The dashed horizontal line indicates the genome-wide significance threshold of  $P = 2 \times 10^{-8}$ . The y-axis  
832 was truncated for ease of interpretation.

833

834 **Figure 2:** Regional HbA1c association plots in the *G6PD* region in non-diabetic African-Americans and Hispanics in TOPMed  
835 cohorts

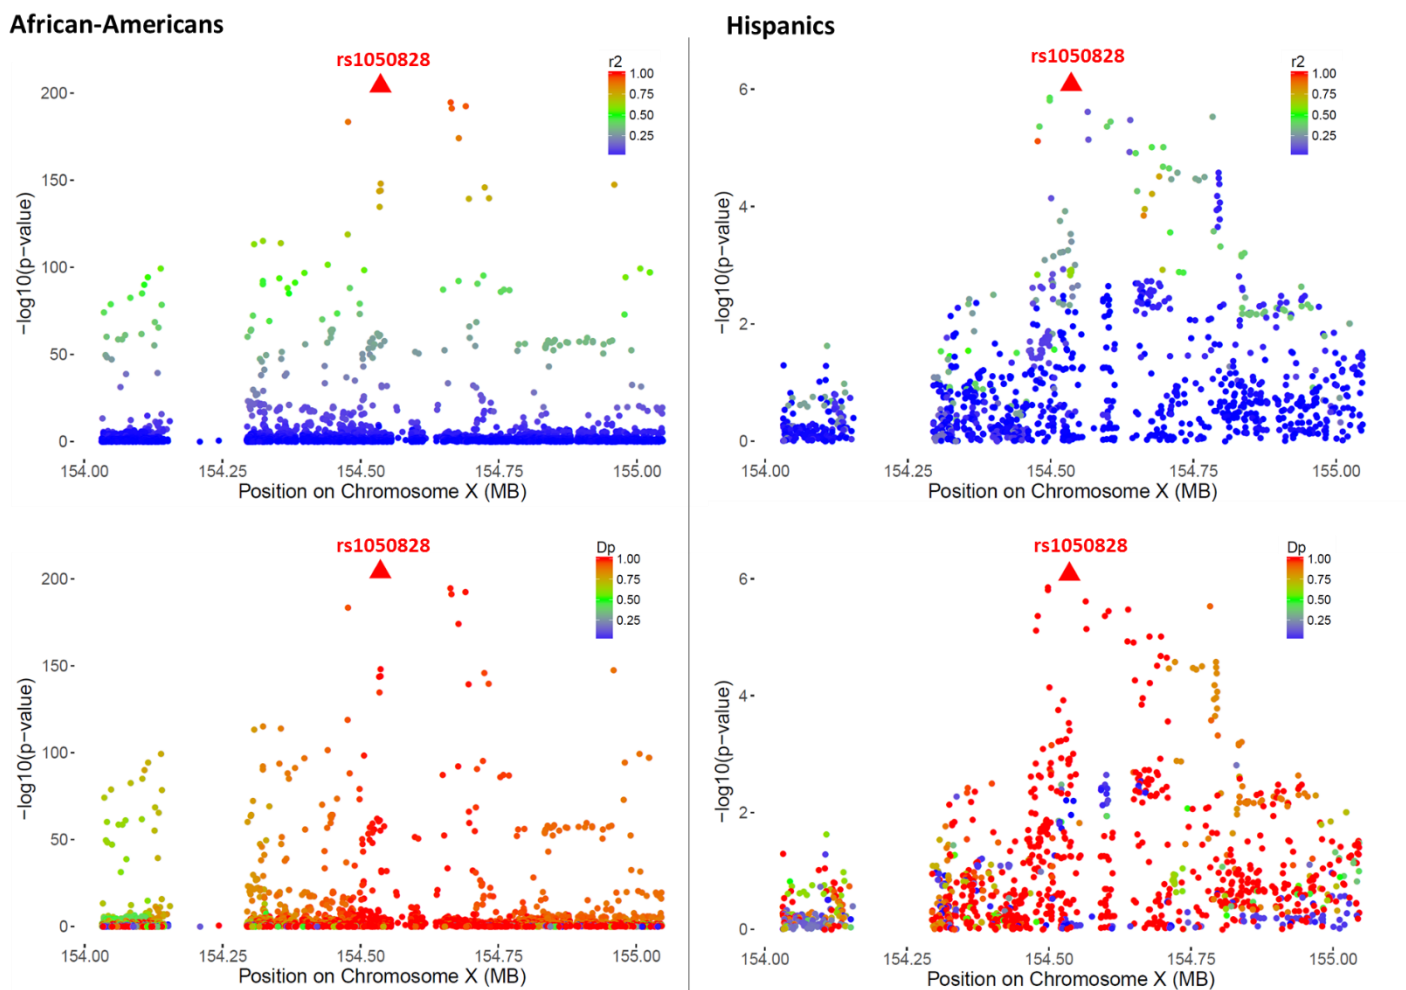

836

837 Association plots are displayed separately in African-Americans (left-side) and in Hispanics (right-side). Single nucleotide variants are  
838 plotted with their P-values ( $-\log_{10}$  values, y-axis) as a function of build 38 genomic position on chromosome X (x-axis). The local  
839 linkage disequilibrium (LD) structure ( $r^2$  - top or  $D'$  - bottom) between the top associated single nucleotide variant rs1050828 (red  
840 triangle) and correlated proxies is indicated in color according to a blue to red scale from  $r^2/D'=0$  to 1 and was calculated separately in  
841 non-diabetic African-Americans and Hispanics TOPMed cohorts.



842 **Figure 3:** Sequential conditional analyses in the *G6PD* region in non-diabetic African-  
843 Americans and Hispanics in TOPMed cohorts

### African-Americans

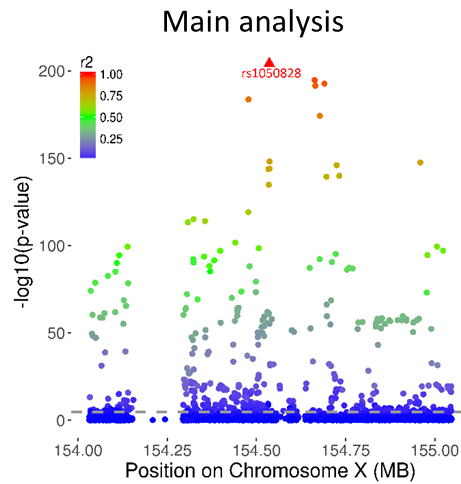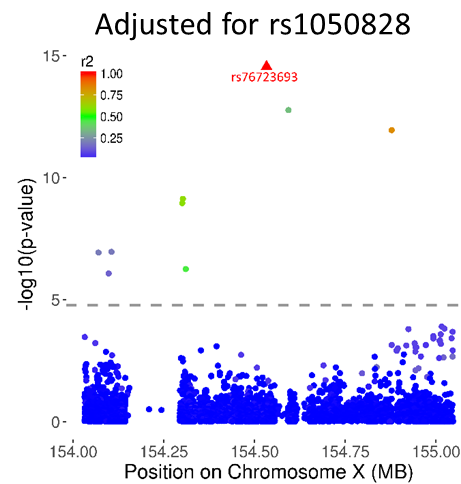

### Adjusted for rs1050828 & rs76723693

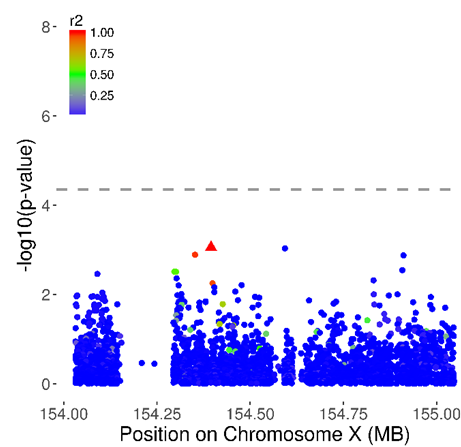

### Hispanics

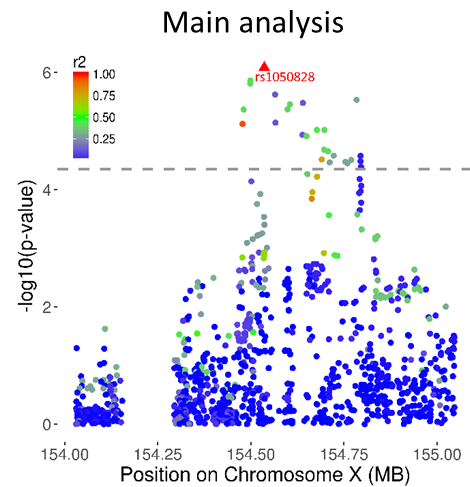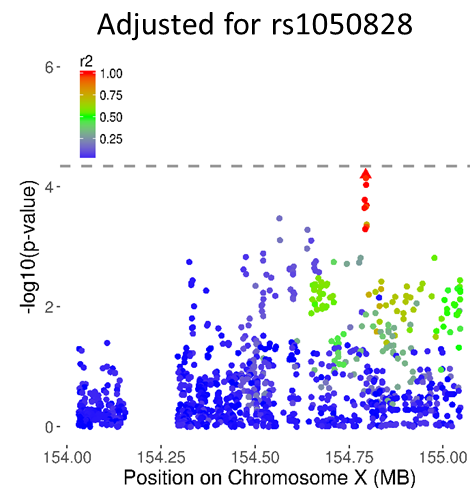

844

845 Association plots are displayed separately in African-Americans (left-side) and in Hispanics  
846 (right-side). Single nucleotide variants are plotted with their P-values ( $-\log_{10}$  values, y-axis) as a  
847 function of build 38 genomic position on chromosome X (x-axis). The local linkage  
848 disequilibrium (LD) structure ( $r^2$  - top or  $D'$  - bottom) between the top associated single  
849 nucleotide variant (red triangle) and correlated proxies is indicated in color according to a blue to  
850 red scale from  $r^2/D'=0$  to 1 and was calculated separately in non-diabetic African-Americans  
851 and Hispanics TOPMed cohorts. Significance thresholds to declare an association signal as  
852 distinct are indicated by a red line ( $P=1.7\times 10^{-5}$  in African-Americans and  $P=4.5\times 10^{-5}$  in  
853 Hispanics, based on the number of single nucleotide variants in the region with a minor allele  
854 count greater than 20).

855 **Figure 4:** Mean HbA1c levels according to genotypes at both G6PD variants (rs76723693 and rs1050828) and stratified by sex

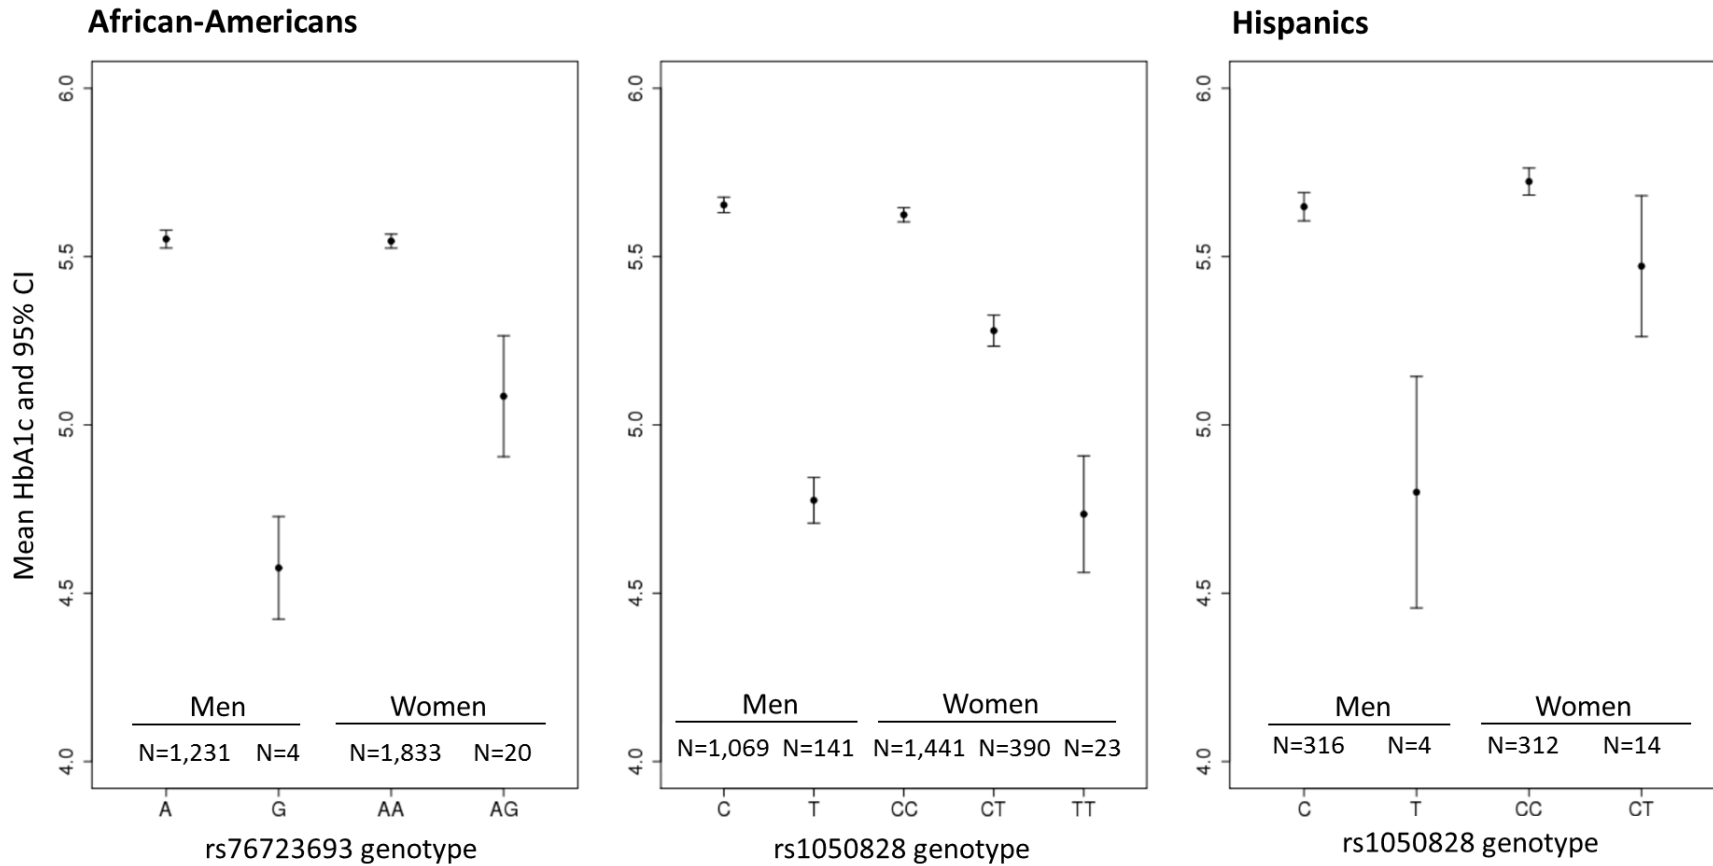

856

857 Plots are displayed separately in African-Americans (left and center) and in Hispanics (right). Due to the limited sample size of

858 African-Americans women carrying two copies of the rare G allele at rs76723693, they are not represented on this plot.

859 In AA, the *G6PD* rs76723693 variant was associated with a decrease in HbA1c of 0.98%-units (95% Confidence Interval (CI) 0.51–  
860 1.44) per allele in hemizygous men and 0.46%-units (95% CI 0.26–0.66) in heterozygous women; whereas, the *G6PD* rs1050828  
861 variant was associated with a decrease in HbA1c of 0.88%-units (95% CI 0.81–0.95) per allele in hemizygous men and 0.34%-units  
862 (95% CI 0.30–0.39) in heterozygous women In HA, the *G6PD* rs1050828 variant was associated with a decrease in HbA1c of 0.84%-  
863 units (95% CI 0.47–1.22) per allele in hemizygous men and 0.25%-units (95% CI 0.06–0.45) in heterozygous women.

864 **Table 1:** Most associated single nucleotide variants in the regions detected at the genome-wide level ( $P < 2 \times 10^{-8}$ ) by ancestry and in the  
865 meta-analysis of HbA1c in non-diabetic individuals in TOPMed cohorts

|                       |             |                       |                | Meta-analysis |      |                | Europeans (N=6,158) |       |      |                | African-Americans (N=3,123) |       |      |                | Hispanics (N=650) |       |      |                | Asians (N=407)   |      |      |                |
|-----------------------|-------------|-----------------------|----------------|---------------|------|----------------|---------------------|-------|------|----------------|-----------------------------|-------|------|----------------|-------------------|-------|------|----------------|------------------|------|------|----------------|
| MarkerID <sup>b</sup> | rsID        | Closest Gene          | Ref/Alt Allele | Beta          | SE   | <i>P value</i> | MAF <sup>a</sup>    | Beta  | SE   | <i>P value</i> | MAF <sup>a</sup>            | Beta  | SE   | <i>P value</i> | MAF <sup>a</sup>  | Beta  | SE   | <i>P value</i> | MAF <sup>a</sup> | Beta | SE   | <i>P value</i> |
| 7:44186502            | rs2971670   | <i>GCK</i>            | C/T            | 0.04          | 0.01 | 1.7E-09        | 0.18                | 0.03  | 0.01 | 1.6E-05        | 0.18                        | 0.06  | 0.01 | 1.6E-04        | 0.21              | 0.05  | 0.03 | 0.04           | 0.19             | 0.04 | 0.03 | 0.20           |
| 10:69334748           | rs17476364  | <i>HK1</i>            | T/C            | -0.09         | 0.01 | 3.1E-21        | 0.10                | -0.08 | 0.01 | 3.2E-18        | 0.02                        | -0.09 | 0.04 | 0.04           | 0.06              | -0.15 | 0.04 | 5.4E-04        |                  |      |      |                |
| 11:5464062            | rs1039215   | <i>HBG2/<br/>HBE1</i> | A/G            | -0.21         | 0.04 | 2.0E-09        |                     |       |      |                | 0.03                        | -0.21 | 0.04 | 2.0E-09        |                   |       |      |                |                  |      |      |                |
| 17:82739582           | rs113373052 | <i>FN3K</i>           | C/T            | 0.03          | 0.01 | 4.5E-10        | 0.32                | 0.03  | 0.01 | 4.0E-08        | 0.29                        | 0.02  | 0.01 | 0.06           | 0.39              | 0.03  | 0.02 | 0.15           | 0.49             | 0.05 | 0.02 | 0.04           |
| X:154536002           | rs1050828   | <i>G6PD</i>           | C/T            | -0.41         | 0.01 | 5.1E-210       |                     |       |      |                | 0.12                        | -0.41 | 0.01 | 8.4E-205       | 0.02              | -0.37 | 0.07 | 8.3E-07        |                  |      |      |                |

866

867 <sup>a</sup>MAF: minor allele frequency

868 <sup>b</sup>MarkerID is defined as Chromosome:Position with positions on Build 38.

869

870 **Table 2:** Combined and sex-stratified conditional association analyses of HbA1c for the two distinct single nucleotide variants in the  
 871 G6PD region in non-diabetic African-Americans in TOPMed cohorts

|                       |            |                   |                  | Pooled analysis<br>(N=3,123) |      |                        | Conditional analysis on<br>rs1050828 |      |                       | Males (N=1,269) |      |                        | Females (N=1,854) |      |                       |                                              |
|-----------------------|------------|-------------------|------------------|------------------------------|------|------------------------|--------------------------------------|------|-----------------------|-----------------|------|------------------------|-------------------|------|-----------------------|----------------------------------------------|
| MarkerID <sup>c</sup> | rsID       | Ref/Alt<br>Allele | MAF <sup>a</sup> | Beta                         | SE   | <i>P value</i>         | Beta                                 | SE   | <i>P value</i>        | Beta            | SE   | <i>P value</i>         | Beta              | SE   | <i>P value</i>        | Heterogeneity<br><i>P value</i> <sup>b</sup> |
| X:154533025           | rs76723693 | A/G               | 0.005            | -0.44                        | 0.07 | 2.2x10 <sup>-9</sup>   | -0.50                                | 0.06 | 2.8x10 <sup>-15</sup> | -0.52           | 0.12 | 6.8x10 <sup>-6</sup>   | -0.33             | 0.10 | 6.2x10 <sup>-4</sup>  | 0.19                                         |
| X:154536002           | rs1050828  | C/T               | 0.12             | -0.41                        | 0.01 | 8.4x10 <sup>-205</sup> | -                                    | -    | -                     | -0.44           | 0.02 | 2.3x10 <sup>-148</sup> | -0.37             | 0.02 | 2.7x10 <sup>-69</sup> | 0.008                                        |

872 <sup>a</sup>MAF: Minor allele frequency

873 <sup>b</sup>Heterogeneity P value: test of difference in effect sizes between males and females, accounting for the correlation between males and  
 874 females statistics

875 <sup>c</sup>MarkerID is defined as Chromosome:Position. Positions are indicated on Build 38.

876

877 **Table 3:** Analysis of HbA1c associations with rs1050828, X:154536002, alternate allele T, in non-diabetic African-Americans and  
 878 Hispanics in TOPMed cohorts

|         | African-Americans |                  |       |      |                |                         | Hispanics |                  |       |      |                |                         |
|---------|-------------------|------------------|-------|------|----------------|-------------------------|-----------|------------------|-------|------|----------------|-------------------------|
|         | N                 | MAF <sup>a</sup> | Beta  | SE   | <i>P value</i> | % of variance explained | N         | MAF <sup>a</sup> | Beta  | SE   | <i>P value</i> | % of variance explained |
| All     | 3,123             | 0.12             | -0.41 | 0.01 | 8.4E-205       | 0.23                    | 650       | 0.02             | -0.37 | 0.07 | 8.3E-07        | 0.04                    |
| Males   | 1,269             | 0.12             | -0.44 | 0.02 | 2.3E-148       | 0.35                    | 323       | 0.01             | -0.45 | 0.11 | 3.5E-05        | 0.05                    |
| Females | 1,854             | 0.12             | -0.37 | 0.02 | 2.7E-69        | 0.14                    | 327       | 0.02             | -0.28 | 0.1  | 4.5E-03        | 0.02                    |

879 <sup>a</sup>MAF: Minor allele frequency
